# Supplementary material for: Hierarchically Porous Microspheres by Thiol-ene Photopolymerization of High Internal Phase Emulsions-in-Water Colloidal Systems
Source: MDPI journal article supplement (doi:10.3390/polym13193366), 2021-09-30
Supplement: s1 [file s1]

Supplementary Information

# Hierarchically porous microspheres by thiol-ene photopolymerization of high internal phase emulsions-in-water colloidal systems

Stanko Kramer, Peter Krajnc\*

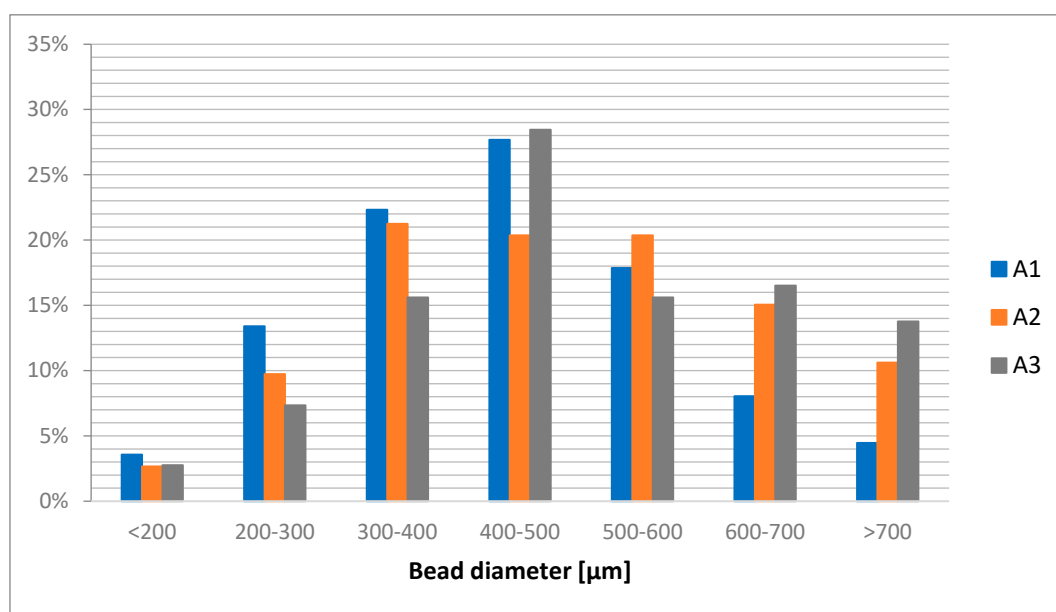

Figure S1. Size distribution of the tetrathiol based microspheres.

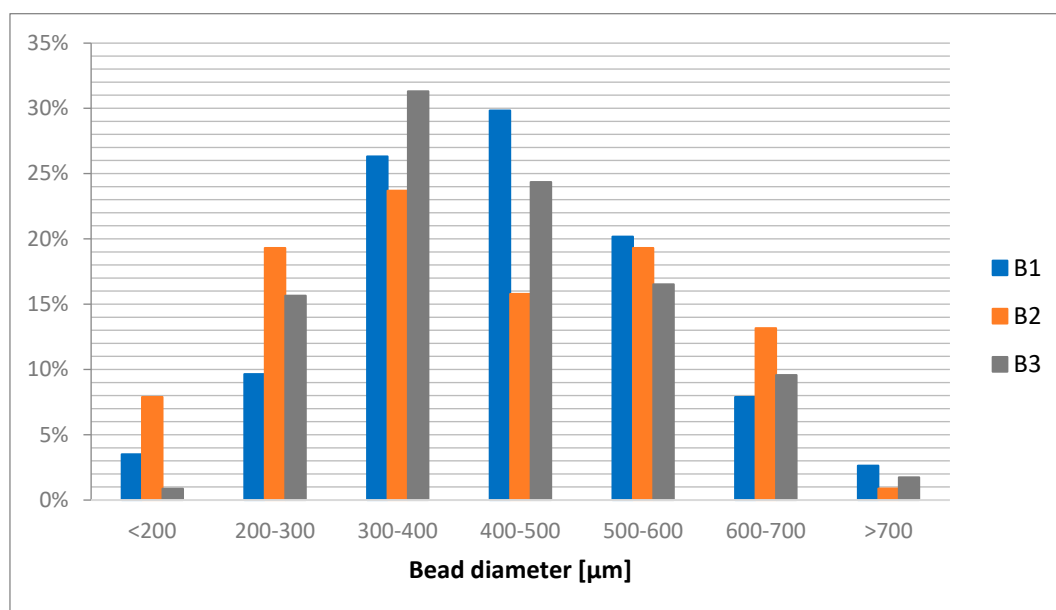

Figure S2. Size distribution of the trithiol based microspheres

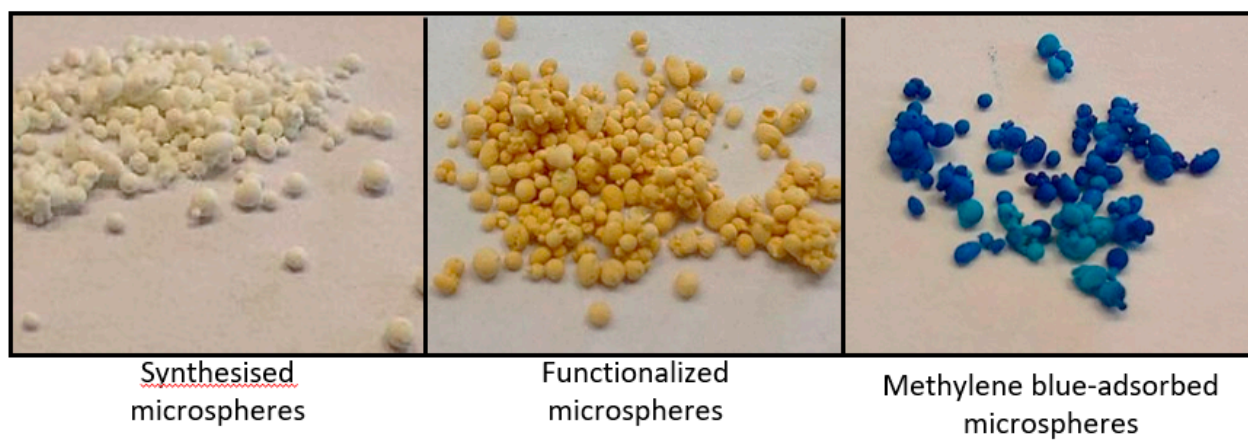

Figure S3. Microspheres appearance after functionalization and adsorption
